# Supplementary material for: Ductal Dilatation of ≥5 mm in Intraductal Papillary Mucinous Neoplasm Should Trigger the Consideration for Pancreatectomy: A Meta-Analysis and Systematic Review of Resected Cases
Source: MDPI journal article supplement (doi:10.3390/cancers13092031), 2021-04-22
Supplement: s1 [file s1]

Supplementary

# Ductal Dilatation of $\geq 5$ mm in Intraductal Papillary Mucinous Neoplasm Should Trigger the Consideration for Pancreatectomy: A Meta-Analysis and Systematic Review of Resected Cases

Y.H. Andrew Wu et. al.

The following search strategy was used:

Database(s): Ovid MEDLINE(R) ALL 1946 to February 27, 2020

Search Strategy:

| # | Searches                                                                                                                                                                                                                                                                                                                                                                        | Results |
|---|---------------------------------------------------------------------------------------------------------------------------------------------------------------------------------------------------------------------------------------------------------------------------------------------------------------------------------------------------------------------------------|---------|
| 1 | (intraductal papillary mucinous or intraductal mucinous papillary or ipmn* or ipmt*).tw,kf. or exp Pancreatic Intraductal Neoplasms/                                                                                                                                                                                                                                            | 3326    |
| 2 | (dilat* or size* or diameter* or cut off* or cutoff* or mm or millimeter* or milli meter* or ((radio-graphic* or CT or comput* tomograph* or comput* axial tomograph* or MRI or magnetic reso-nance imag* or magnetic resonance tomograph* or MRCP or magnetic resonance cholangiopan-creatograph* or imag*) adj2 (anlys* or determination or assessment* or measure*))).tw,kf. | 2015842 |
| 3 | 1 and 2                                                                                                                                                                                                                                                                                                                                                                         | 1003    |
| 4 | remove duplicates from 3                                                                                                                                                                                                                                                                                                                                                        | 1002    |

Database(s): Embase Suite: Embase (1974 to February 28, 2020); Medline (1966 to February 28, 2020); Embase Classic (1947 to 1973).

Search Strategy:

| # | Searches                                                                                                                                                                                                                                                                                                                                                                                                                                     | Results |
|---|----------------------------------------------------------------------------------------------------------------------------------------------------------------------------------------------------------------------------------------------------------------------------------------------------------------------------------------------------------------------------------------------------------------------------------------------|---------|
| 1 | 'intraductal papillary mucinous':ti,ab OR 'intraductal mucinous papillary':ti,ab OR ipmn*:ti,ab OR ipmt*:ti,ab OR 'intraductal papillary mucinous tumor'/exp                                                                                                                                                                                                                                                                                 | 7656    |
| 2 | dilat*:ti,ab OR size*:ti,ab OR diameter*:ti,ab OR 'cut off*:ti,ab OR cutoff*:ti,ab OR mm:ti,ab OR mil-limeter*:ti,ab OR 'milli meter*:ti,ab OR (((radiographic* OR ct OR 'comput* tomograph*' OR 'com-put* axial tomograph*' OR mri OR 'magnetic resonance imag*' OR 'magnetic resonance tomo-graph*' OR mrcp OR 'magnetic resonance cholangiopancreatograph*' OR imag*) NEAR/2 (anlys* OR determination OR assessment* OR measure*)):ti,ab) | 2681414 |
| 3 | #1 AND #2                                                                                                                                                                                                                                                                                                                                                                                                                                    | 2591    |
| 4 | #1 AND #2 AND ([conference abstract]/lim OR [conference paper]/lim OR [conference review]/lim)                                                                                                                                                                                                                                                                                                                                               | 1418    |
| 5 | #3 NOT #4                                                                                                                                                                                                                                                                                                                                                                                                                                    | 1173    |

Database(s): Web Science (Science Citation Index Expanded, 1900 to February 28, 2020; Social Sciences Citation Index, 1900 to February 28, 2020).

Search Strategy:

| # | Searches                                                                                                                                                                                                                                                                                                                                                                               | Results   |
|---|----------------------------------------------------------------------------------------------------------------------------------------------------------------------------------------------------------------------------------------------------------------------------------------------------------------------------------------------------------------------------------------|-----------|
| 1 | TS=("intraductal papillary mucinous" or "intraductal mucinous papillary" or ipmn* or ipmt*)                                                                                                                                                                                                                                                                                            | 3,860     |
| 2 | TS=(dilat* or size* or diameter* or "cut off*" or cutoff* or mm or millimeter* or "milli meter*" or (ra-diographic* or CT or "comput* tomograph*" or "comput* axial tomograph*" or MRI or "magnetic resonance imag*" or "magnetic resonance tomograph*" or MRCP or "magnetic resonance cholangi-opancreatograph or imag*) near/2 (anlys* or determination or assessment* or measure*)) | 3,658,238 |
| 3 | #2 AND #1                                                                                                                                                                                                                                                                                                                                                                              | 3 863     |

Database(s): Google Scholar.

Search Strategy:.

| # | Searches                                                                          | Results |
|---|-----------------------------------------------------------------------------------|---------|
| 1 | intraductal papillary mucinous neoplasm duct diameter size image analysis measure | 1st 300 |

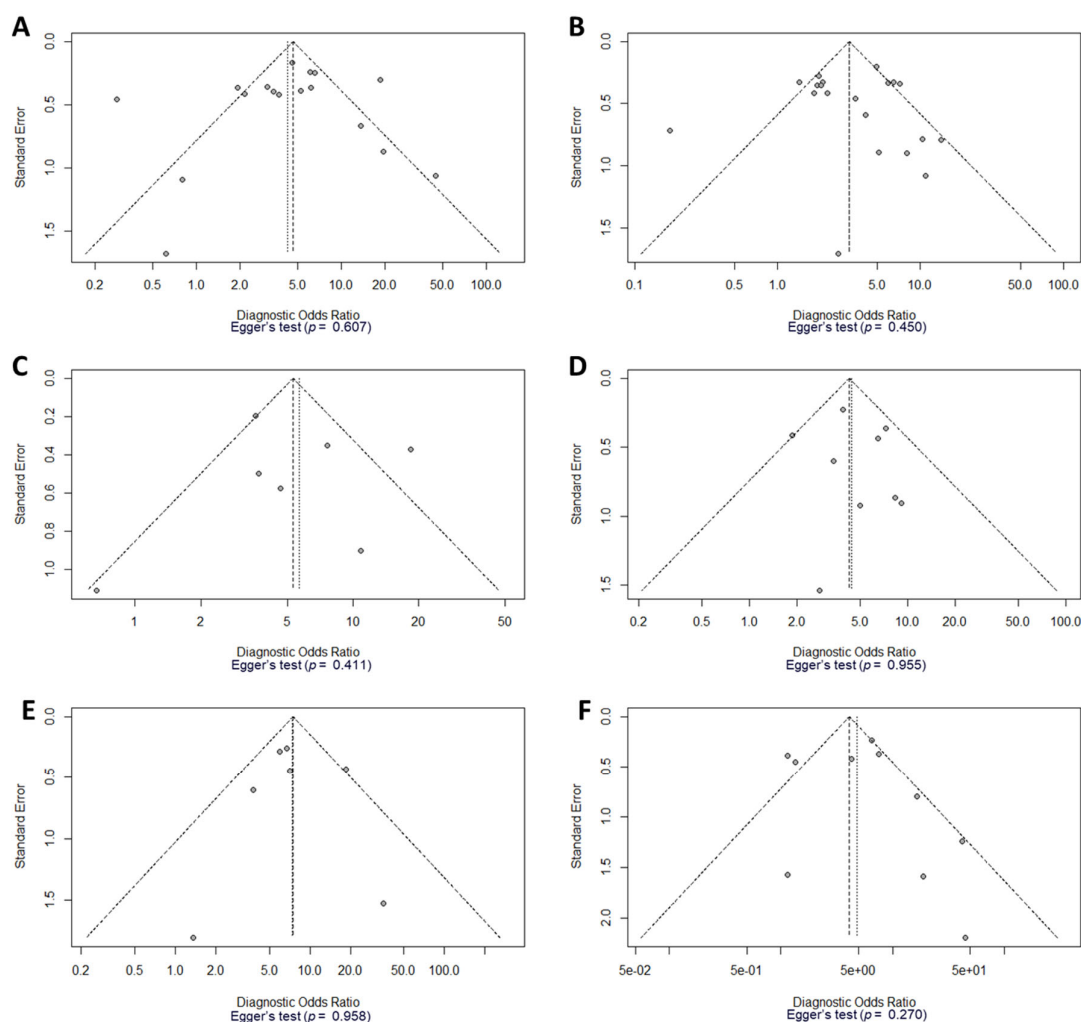

**Figure S2.** Funnel plot with Diagnostic Odds Ratio (DOR) and Egger's Test for publication bias assessment: A: Malignancy (M) and non-malignancy (NM), cutoff of 5 mm; B: Malignancy (M) and non-malignancy (NM), cutoff of 10 mm; C: High-grade dysplasia (HGD) and non-malignancy (NM), cutoff of 5 mm; D: High-grade dysplasia (HGD) and non-malignancy (NM), cutoff of 10 mm; E: Invasive carcinoma (IC) vs. non-malignancy (NM), cutoff of 5 mm; F: Invasive carcinoma (IC) vs. non-malignancy (NM), cutoff of 10 mm.

**Table S1 ROBINS-I Risk of Bias Assessment of included Articles**

| Author                | Year | Confounding | Participants Selection | Intervention Classification | Intended Intervention Deviation | Missing Data | Outcome Measurement | Selective Reporting | Overall  |
|-----------------------|------|-------------|------------------------|-----------------------------|---------------------------------|--------------|---------------------|---------------------|----------|
| K. Takanami et al.    | 2011 | Serious     | Serious                | Moderate                    | Low                             | Serious      | Low                 | Serious             | Serious  |
| A. Roch et al.        | 2014 | Serious     | Serious                | Moderate                    | Low                             | Moderate     | Low                 | NR                  | Moderate |
| M. Barron et al.      | 2014 | Serious     | Serious                | Moderate                    | Low                             | NR           | Low                 | NR                  | Moderate |
| T. Hackert et al.     | 2015 | Serious     | Serious                | Moderate                    | Low                             | Moderate     | Low                 | NR                  | Moderate |
| Y. Kim et al.         | 2015 | Serious     | Serious                | Moderate                    | Low                             | Moderate     | Low                 | NR                  | Moderate |
| S. Yamada et al.      | 2015 | Serious     | Serious                | Moderate                    | Low                             | Moderate     | Low                 | Moderate            | Moderate |
| J. Kim et al.         | 2015 | Serious     | Serious                | Moderate                    | Low                             | NR           | Low                 | NR                  | Moderate |
| M. Kang et al.        | 2015 | Serious     | Serious                | Moderate                    | Low                             | NR           | Low                 | NR                  | Moderate |
| N. Seo et al.         | 2016 | Serious     | Serious                | Moderate                    | Low                             | Moderate     | Low                 | NR                  | Moderate |
| M. Sugimoto et al.    | 2016 | Serious     | Serious                | Moderate                    | Low                             | Moderate     | Low                 | NR                  | Moderate |
| E. Robles et al.      | 2016 | Serious     | Serious                | Moderate                    | Moderate                        | Serious      | Low                 | NR                  | Serious  |
| S. Yu et al.          | 2017 | Serious     | Serious                | Moderate                    | Low                             | NR           | Low                 | NR                  | Moderate |
| S. Choi et al.        | 2017 | Serious     | Serious                | Moderate                    | Low                             | Moderate     | Moderate            | NR                  | Moderate |
| M. Tsukagoshi et al.  | 2018 | Serious     | Serious                | Moderate                    | Low                             | NR           | Low                 | NR                  | Moderate |
| G. Marchegiani et al. | 2018 | Serious     | Serious                | Moderate                    | Low                             | NR           | Low                 | Moderate            | Moderate |
| Y. Masaki et al.      | 2019 | Serious     | Serious                | Moderate                    | Low                             | Moderate     | Low                 | NR                  | Moderate |
| I. Jan et al.         | 2019 | Serious     | Serious                | Moderate                    | Low                             | NR           | Low                 | NR                  | Moderate |
| M. Del Chiaro et al.  | 2019 | Serious     | Serious                | Moderate                    | Low                             | Moderate     | Moderate            | NR                  | Moderate |
| J. Lee et al.         | 2019 | Serious     | Serious                | Moderate                    | Low                             | Moderate     | Low                 | NR                  | Moderate |
| J. Hwang et al.       | 2020 | Serious     | Serious                | Moderate                    | Moderate                        | NR           | Low                 | NR                  | Moderate |

Abbreviations: NR, Not Reported.

**Table S2 Odds ratio, Sensitive, and Specificity for different comparisons and cutoffs**

| Cutoffs  | Malignancy to NM |             |             | High Grade Dysplasia to NM |             |             | Invasive Carcinoma to NM |             |             |
|----------|------------------|-------------|-------------|----------------------------|-------------|-------------|--------------------------|-------------|-------------|
|          | OR               | Sensitivity | Specificity | OR                         | Sensitivity | Specificity | OR                       | Sensitivity | Specificity |
| ≥ 5 mm   | 4.36             | 74.8%       | 58.6%       | 5.66                       | 72.2%       | 70.1%       | 7.4                      | 75.6%       | 69.7%       |
| ≥ 10 mm  | 3.18             | 33.8%       | 86.4%       | 4.36                       | 35.7%       | 88.7%       | 4.75                     | 36.6%       | 88.2%       |
| ≥ 5 mm*  | 4.36*            | 74.6%*      | 58.7%*      | 6.39*                      | 71.8%*      | 75.0%*      | 7.72*                    | 74.4%*      | 74.6%*      |
| ≥ 10 mm* | 3.08*            | 33.3%*      | 86.1%*      | 4.65*                      | 38.0%*      | 88.9%*      | 4.68*                    | 34.5%*      | 87.8%*      |

Abbreviations: NM, Non-Malignancy

\* Indicates the estimates with the M. Del Chiaro et al. study removed.
